# Supplementary material for: MYH10 Combines with MYH9 to Recruit USP45 by Deubiquitinating Snail and Promotes Serous Ovarian Cancer Carcinogenesis, Progression, and Cisplatin Resistance
Source: PubMed Central journal article supplement (PMC10190571; doi:10.1002/advs.202203423), 2023-03-16
Supplement: ADVS-10-2203423-s001.pdf [file ADVS-10-2203423-s001.pdf]

## Supporting Information

for *Adv. Sci.*, DOI 10.1002/adv.202203423

MYH10 Combines with MYH9 to Recruit USP45 by Deubiquitinating Snail and Promotes Serous Ovarian Cancer Carcinogenesis, Progression, and Cisplatin Resistance

*Longyang Liu\**, *Chunlin Chen*, *Ping Liu*, *Jing Li*, *Zhanjun Pang*, *Jiayu Zhu*, *Zhongqiu Lin*, *Haixu Zhou*, *Yingying Xie*, *Tiancai Lan*, *Zhe-Sheng Chen\**, *Zhaoyang Zeng\** and *Weiyi Fang\**

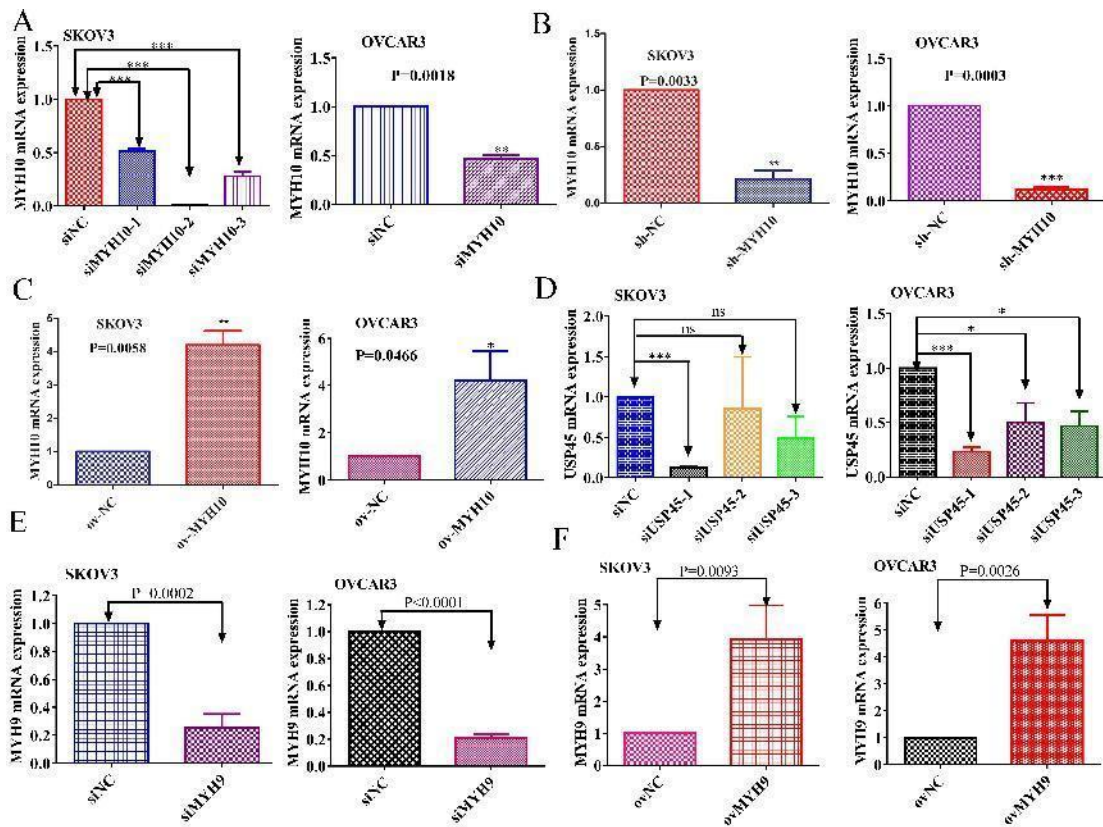

### Supplementary Figure S1: Interfering or overexpression effects

A. The interfering effects of siRNA targeting MYH10 in SOC cells. B. The downregulated MYH10 expression mediated by a lentiviral-shMYH10 vector in SOC cells. C. The overexpressed effects of MYH10 plasmid in SOC cells. D. The interfering effects of siRNA targeting USP45 in SOC cells. E. The interfering effects of siRNA targeting MYH9 in SOC cells. F. The overexpressed effects of MYH9 plasmid in SOC cells.

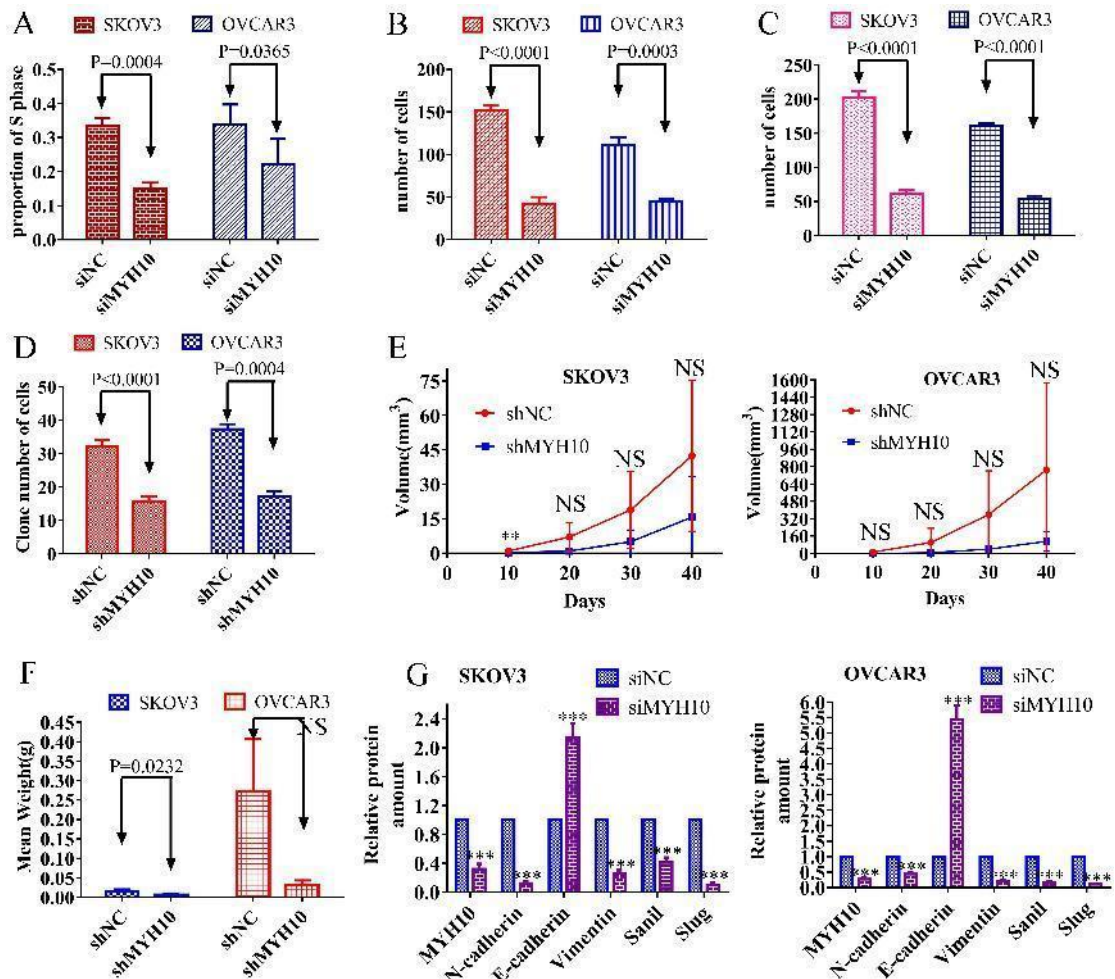

**Supplementary Figure S2: The quantitative results of Fig. 2**

A. The quantitative results of EdU assays in MYH10 knockdown SOC cells. B. The quantitative results of Transwell assays in MYH10 knockdown SOC cells. C. The quantitative results of Boyden assays in MYH10 knockdown SOC cells. D. The quantitative results of clone formation assays in MYH10 knockdown SOC cells. E. The tumor volume generated by shMYH10 and shNC in SKOV3 and OVCAR3 cells, respectively. F. The mean tumor weight generated by shMYH10 and shNC in SOC cells. G. The quantitative results of Western blot assays in MYH10 knockdown SOC cells

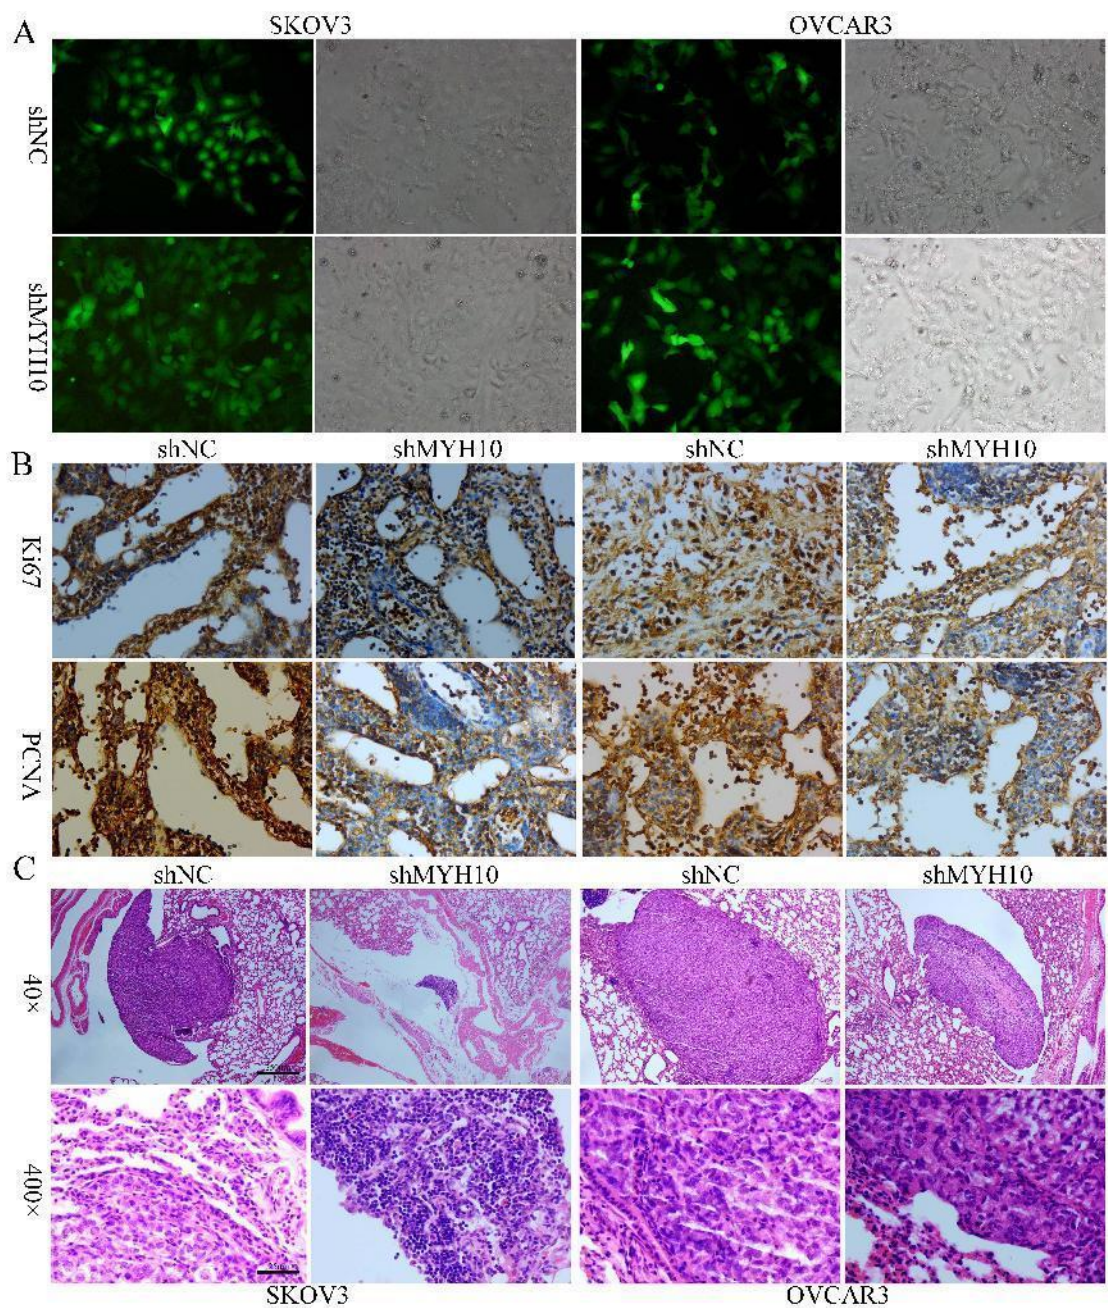

**Supplementary Figure S3: stably transfected cells and tumor staining of subcutaneous or lung with IHC and HE**

A. Stably transfected SKOV3 and OVCAR3 cells with shNC or shMYH10 (Magnification 400 $\times$ . scale bar, 25  $\mu$ m). B. The IHC staining of Ki67 and PCNA in a subcutaneous tumor (Magnification 400 $\times$ . scale bar, 25  $\mu$ m). C. The HE staining of tumor formation in the lungs of nude mice (Magnification 40 $\times$ . scale bar, 250  $\mu$ m; or Magnification 400 $\times$ . scale bar, 25  $\mu$ m).

**Supplement Table S1.** siRNA sequences

|            |                     |
|------------|---------------------|
| si-MYH10-1 | GACUGGUCAGGAACUAGAA |
| si-MYH10-2 | GACUCGUCAGGAACUGGAA |
| si-MYH10-3 | CACUCGUCAAGAACUGGAA |
| si-MYH9    | GCAACATCGTCTTCAAGAA |
| si-Snail   | GCUGCAGGACUCUAAUCCA |
| si-USP45-1 | GGCACCUCGAUUUAAAGAU |
| si-USP45-2 | CCCUUUCUCAGAGCUAUAU |
| si-USP45-3 | CAGCCUUGUCCUGUUUCU  |

**Supplement Table S2.** qPCR Primer sequence

|       |                              |
|-------|------------------------------|
| GAPDH | F : CCATCTTCCAGGAGCGAGAT     |
|       | R : TGCTGATGATCTTGAGGCTG     |
| Snail | F : TTCTTCTGCGCTACTGCTGCG    |
|       | R : GGCAGGTATGGAGAGGAAGA     |
| MYH9  | F : AGTTTGTCTCGGAGCTGTGG     |
|       | R : GGTTCGTGTTCTCAGCGTA      |
| MYH10 | F : CGACGCGTGCCAACGCATC      |
|       | R : GACACAGTTGATCTTTCAGGAAGG |
| USP45 | F : GGACCCCTTTACCCTCTGTC     |
|       | R : ACCTCAAATGCTTCCCCTCT     |

**Supplement Table S3.** the primary antibody used in WB, IF, CoIP and IHC

| A list of antibodies used for WB, ChIP, IHC |            |             |         |                                         |
|---------------------------------------------|------------|-------------|---------|-----------------------------------------|
| Antibodies name                             | Cat. No    | Company     | Species | Dulution                                |
| Ki67                                        | ab16667    | Abcam       | Rabbit  | 1:100 (IHC)                             |
| Slug                                        | 9585       | CST         | Rabbit  | 1:1000 (WB)                             |
| PCNA                                        | 13110      | CST         | Rabbit  | 1:1000 (IHC)                            |
| MYH9                                        | 11128-1-AP | Proteintech | Rabbit  | 1:1000 (WB); 1:10 (CoIP);<br>1:100 (IF) |
| MYH9                                        | 60233-1-Ig | Proteintech | Mouse   | 1:1000 (WB); 1:100 (IF)                 |
| $\beta$ -tubulin                            | 66240-1-Ig | Proteintech | Mouse   | 1:1000 (WB)                             |
| Snail                                       | 3879       | CST         | Rabbit  | 1:1000 (WB)                             |
| Snail                                       | 26183-1-AP | Proteintech | Rabbit  | 1:1000 (WB); 1:100 (IF)                 |
| MYH10                                       | ab684      | Abcam       | Mouse   | 1:1000 (WB); 1:100 (IF)                 |
| MYH10                                       | 19673-1-AP | Proteintech | Rabbit  | 1:10 (CoIP); 1:200 (IHC)                |
| Ubiquitin                                   | 3933       | CST         | Rabbit  | 1:1000 (WB)                             |
| USP45                                       | 35125      | SAB         | Rabbit  | 1:1000 (WB)                             |
| E-cadherin                                  | 60335-1-Ig | Proteintech | Mouse   | 1:1000 (WB)                             |
| N-cadherin                                  | 66219-1-Ig | Proteintech | Mouse   | 1:1000 (WB)                             |

|            |            |             |        |                           |
|------------|------------|-------------|--------|---------------------------|
| normal IgG | 2729S      | CST         | Rabbit | 1:10 (CoIP)               |
| GAPDH      | CW0100M    | CWBIO       | Mouse  | 1:1000 (WB)               |
| Vimentin   | 10366-1-AP | Proteintech | Rabbit | 1:1000 (WB)               |
| Flag       | F7425      | Sigma       | Rabbit | 1:1000 (WB); 1:20 (Co-IP) |
